# Supplementary material
Source: PubMed Central journal article supplement (PMC8520492)

**Is gastric cancer becoming a rare disease? A global assessment of predicted incidence trends to 2035.**

Melina Arnold, Jin Young Park, M. Constanza Camargo, Nuno Lunet, David Forman, Isabelle Soerjomataram

Supplementary Material

**Annex Table 1:** Number of new gastric cancer cases, age-standardized incidence rates and percentage change in cases due to population and risk, 2010 and 2035, males.

|                           | Population<br>(annual, million) |       | Number of new<br>cases |        | Age-standardized<br>rate |      | Total<br>change<br>(%) | Change<br>due to<br>population<br>(%) | Change<br>due to<br>risk (%) |
|---------------------------|---------------------------------|-------|------------------------|--------|--------------------------|------|------------------------|---------------------------------------|------------------------------|
|                           | 2010                            | 2035  | 2010                   | 2035   | 2010                     | 2035 |                        |                                       |                              |
| <b>South America</b>      |                                 |       |                        |        |                          |      |                        |                                       |                              |
| Brazil†                   | 96.9                            | 112.1 | 11855                  | 12031  | 13.8                     | 6.4  | 1.5                    | 119.4                                 | -117.9                       |
| Chile†                    | 8.4                             | 10.0  | 2913                   | 5323   | 30.4                     | 29.1 | 82.8                   | 108.5                                 | -25.7                        |
| Colombia†                 | 22.6                            | 26.4  | 3746                   | 5112   | 19.4                     | 11.5 | 36.5                   | 131.4                                 | -94.9                        |
| <b>Northern America</b>   |                                 |       |                        |        |                          |      |                        |                                       |                              |
| Canada                    | 13.0                            | 20.8  | 1419                   | 2720   | 6.2                      | 5.9  | 91.7                   | 134.7                                 | -43.1                        |
| U.S.†                     | 152.4                           | 181.3 | 13643                  | 19800  | 5.8                      | 5.6  | 45.1                   | 70.3                                  | -25.2                        |
| U.S.: Black†              | 20.2                            | 24.4  | 1884                   | 3000   | 8.7                      | 6.9  | 59.3                   | 98.9                                  | -39.7                        |
| U.S.: White†              | 121.6                           | 135.4 | 10908                  | 16536  | 5.3                      | 5.7  | 51.6                   | 60.6                                  | -9.0                         |
| <b>Eastern Asia</b>       |                                 |       |                        |        |                          |      |                        |                                       |                              |
| China†                    | 699.9                           | 737.5 | 141929                 | 213803 | 16.8                     | 13.0 | 50.6                   | 97.9                                  | -47.2                        |
| Japan†                    | 62.9                            | 57.6  | 79268                  | 89797  | 52.9                     | 43.2 | 13.3                   | 21.0                                  | -7.7                         |
| Republic of Korea†        | 24.8                            | 26.3  | 19189                  | 42795  | 58.8                     | 60.8 | 123.0                  | 105.9                                 | 17.1                         |
| <b>South-Eastern Asia</b> |                                 |       |                        |        |                          |      |                        |                                       |                              |
| Thailand†                 | 32.9                            | 33.4  | 1946                   | 4224   | 4.8                      | 5.3  | 117.1                  | 105.2                                 | 11.9                         |
| <b>Western Asia</b>       |                                 |       |                        |        |                          |      |                        |                                       |                              |
| Turkey†                   | 35.6                            | 44.7  | 4153                   | 7722   | 12.5                     | 10.9 | 85.9                   | 107.4                                 | -21.5                        |
| <b>Eastern Europe</b>     |                                 |       |                        |        |                          |      |                        |                                       |                              |
| Belarus                   | 4.5                             | 4.2   | 1991                   | 1716   | 29.3                     | 23.1 | -13.8                  | 13.0                                  | -26.8                        |
| Bulgaria                  | 3.7                             | 3.0   | 1038                   | 704    | 14.0                     | 9.7  | -32.2                  | -3.0                                  | -29.2                        |

|                        | Population<br>(annual, million) |      | Number of new<br>cases |      | Age-standardized<br>rate |      | Total<br>change<br>(%) | Change<br>due to<br>population<br>(%) | Change<br>due to<br>risk (%) |
|------------------------|---------------------------------|------|------------------------|------|--------------------------|------|------------------------|---------------------------------------|------------------------------|
|                        | 2010                            | 2035 | 2010                   | 2035 | 2010                     | 2035 |                        |                                       |                              |
| Poland†                | 18.5                            | 17.2 | 3456                   | 4071 | 12.5                     | 11.9 | 17.8                   | 47.6                                  | -29.8                        |
| Slovakia               | 1.6                             | 2.6  | 353                    | 729  | 14.7                     | 13.0 | 106.7                  | 148.9                                 | -42.3                        |
| <b>Northern Europe</b> |                                 |      |                        |      |                          |      |                        |                                       |                              |
| Denmark                | 2.8                             | 3.0  | 361                    | 457  | 6.7                      | 5.8  | 26.5                   | 37.3                                  | -10.8                        |
| Estonia                | 0.6                             | 0.6  | 239                    | 188  | 21.0                     | 14.7 | -21.2                  | 15.4                                  | -36.7                        |
| Iceland                | 0.2                             | 0.2  | 16                     | 14   | 5.5                      | 3.4  | -14.8                  | 80.9                                  | -95.7                        |
| Ireland                | 2.3                             | 2.7  | 349                    | 620  | 10.1                     | 9.6  | 77.7                   | 84.1                                  | -6.4                         |
| Lithuania              | 1.5                             | 1.2  | 573                    | 404  | 21.7                     | 16.4 | -29.5                  | -1.5                                  | -28.0                        |
| Norway                 | 2.5                             | 3.2  | 292                    | 354  | 6.3                      | 5.4  | 21.5                   | 67.3                                  | -45.8                        |
| United Kingdom†        | 31.1                            | 35.8 | 4378                   | 4570 | 7.1                      | 5.8  | 4.4                    | 57.5                                  | -53.1                        |
| <b>Southern Europe</b> |                                 |      |                        |      |                          |      |                        |                                       |                              |
| Croatia                | 2.2                             | 1.8  | 656                    | 499  | 14.9                     | 11.5 | -23.9                  | 9.6                                   | -33.6                        |
| Cyprus                 | 0.4                             | 0.7  | 52                     | 98   | 7.7                      | 5.6  | 88.5                   | 110.1                                 | -21.7                        |
| Italy†                 | 29.0                            | 28.3 | 7974                   | 6558 | 11.7                     | 7.4  | -17.8                  | 45.4                                  | -63.1                        |
| Malta                  | 0.2                             | 0.2  | 34                     | 37   | 8.5                      | 6.4  | 8.1                    | 55.7                                  | -47.5                        |
| Slovenia               | 1.1                             | 1.0  | 310                    | 338  | 14.5                     | 13.1 | 9.0                    | 31.3                                  | -22.2                        |
| Spain†                 | 23.1                            | 22.4 | 4560                   | 5023 | 10.7                     | 7.8  | 10.2                   | 57.0                                  | -46.9                        |
| <b>Western Europe</b>  |                                 |      |                        |      |                          |      |                        |                                       |                              |
| Austria                | 4.2                             | 4.4  | 788                    | 930  | 9.1                      | 7.6  | 18.1                   | 47.1                                  | -29.0                        |
| France†                | 30.9                            | 33.9 | 4323                   | 4945 | 7.5                      | 6.2  | 14.4                   | 47.5                                  | -33.1                        |
| Germany†               | 39.7                            | 40.5 | 8323                   | 9541 | 9.8                      | 8.5  | 14.6                   | 41.4                                  | -26.8                        |
| Netherlands            | 8.4                             | 8.8  | 1288                   | 1505 | 7.8                      | 7.0  | 16.9                   | 54.4                                  | -37.6                        |
| Switzerland†           | 3.9                             | 4.7  | 534                    | 1068 | 7.5                      | 8.7  | 100.2                  | 72.4                                  | 27.8                         |

|                | Population<br>(annual, million) |      | Number of new<br>cases |      | Age-standardized<br>rate |      | Total<br>change<br>(%) | Change<br>due to<br>population<br>change<br>(%) | Change<br>due to<br>risk (%) |
|----------------|---------------------------------|------|------------------------|------|--------------------------|------|------------------------|-------------------------------------------------|------------------------------|
|                | 2010                            | 2035 | 2010                   | 2035 | 2010                     | 2035 |                        |                                                 |                              |
| <b>Oceania</b> |                                 |      |                        |      |                          |      |                        |                                                 |                              |
| Australia      | 11.1                            | 14.7 | 1292                   | 1832 | 6.8                      | 6.0  | 41.8                   | 70.8                                            | -29.0                        |
| New Zealand    | 2.2                             | 2.6  | 235                    | 347  | 6.7                      | 6.7  | 47.7                   | 68.4                                            | -20.7                        |

†regional registries: Brazil (Goiana), Chile (Valdivia), China (HongKong, Jiashan, Shanghai), Colombia (Cali), France (Bas-Rhin, Calvados, Doubs, Haut-Rhin, Herault, Isere, Loire-Atlantique, Manche, Martinique, Somme), Germany (Hamburg, Saarland), Italy (Biella, Ferrara, Modena, Naples, Parma, Ragusa, Romagna, Veneto), Japan (Miyagi, Nagasaki, Osaka), Poland (Kielce), Republic of Korea (Busan, Gwangju, Incheon, Seoul, Ulsan), Spain (Albacete, Basque Country, Canary Islands, Cuenca, Girona, Granada, Murcia, Navarra, Tarragona), Switzerland (Geneva, Neuchatel, St Gall-Appenzell, Ticino, Valais, Vaud), Thailand (Chiang Mai, Khon Kaen, Lampang, Songkhla), Turkey (Antalya, Izmir), UK (East England, East Midlands, London, North East, North West, South East, South West, West Midlands, Yorkshire-Humber, Northern Ireland, Scotland), U.S. (SEER9 that includes the states of Connecticut, Hawaii, Iowa, New Mexico and Utah, and the areas of Detroit in Michigan, San Francisco in California, Atlanta in Georgia, and Seattle in Washington)

**Annex Table 2:** Number of new gastric cancer cases, age-standardized incidence rates and percentage change in cases due to population and risk, 2010 and 2035, females.

|                           | Population<br>(annual, million) |       | Number of new<br>cases |        | Age-standardized<br>rate |      | Total<br>change<br>(%) | Change<br>due to<br>population<br>(%) | Change<br>due to<br>risk (%) |
|---------------------------|---------------------------------|-------|------------------------|--------|--------------------------|------|------------------------|---------------------------------------|------------------------------|
|                           | 2010                            | 2035  | 2010                   | 2035   | 2010                     | 2035 |                        |                                       |                              |
| <b>South America</b>      |                                 |       |                        |        |                          |      |                        |                                       |                              |
| Brazil†                   | 99.9                            | 117.1 | 6551                   | 5975   | 6.0                      | 2.6  | -8.8                   | 108.3                                 | -117.1                       |
| Chile†                    | 8.6                             | 10.1  | 1736                   | 3744   | 13.4                     | 12.4 | 115.6                  | 108.7                                 | 6.9                          |
| Colombia†                 | 23.3                            | 27.6  | 2716                   | 4011   | 11.1                     | 7.7  | 47.6                   | 138.1                                 | -90.4                        |
| <b>Northern America</b>   |                                 |       |                        |        |                          |      |                        |                                       |                              |
| Canada                    | 13.0                            | 21.1  | 819                    | 2018   | 3.2                      | 3.6  | 146.4                  | 166.0                                 | -19.6                        |
| U.S.†                     | 156.2                           | 183.7 | 9345                   | 16745  | 3.1                      | 4.1  | 79.2                   | 61.4                                  | 17.8                         |
| U.S.: Black†              | 22.0                            | 26.3  | 1515                   | 3749   | 5.0                      | 6.6  | 147.5                  | 92.2                                  | 55.3                         |
| U.S.: White†              | 124.1                           | 136.6 | 6370                   | 9995   | 2.5                      | 2.9  | 56.9                   | 54.0                                  | 2.9                          |
| <b>Eastern Asia</b>       |                                 |       |                        |        |                          |      |                        |                                       |                              |
| China†                    | 659.9                           | 696.1 | 83967                  | 131284 | 9.4                      | 7.7  | 56.4                   | 101.8                                 | -45.4                        |
| Japan†                    | 65.7                            | 60.9  | 45282                  | 63117  | 21.3                     | 18.5 | 39.4                   | 35.8                                  | 3.6                          |
| Republic of Korea†        | 24.7                            | 26.5  | 10031                  | 20818  | 24.8                     | 27.0 | 107.5                  | 92.6                                  | 14.9                         |
| <b>South-Eastern Asia</b> |                                 |       |                        |        |                          |      |                        |                                       |                              |
| Thailand†                 | 34.3                            | 35.8  | 1738                   | 4702   | 3.5                      | 4.8  | 170.5                  | 114.4                                 | 56.1                         |
| <b>Western Asia</b>       |                                 |       |                        |        |                          |      |                        |                                       |                              |
| Turkey†                   | 36.8                            | 46.2  | 2526                   | 4576   | 6.3                      | 5.3  | 81.2                   | 108.0                                 | -26.8                        |
| <b>Eastern Europe</b>     |                                 |       |                        |        |                          |      |                        |                                       |                              |
| Belarus                   | 5.0                             | 4.8   | 1307                   | 1318   | 12.8                     | 10.4 | 0.8                    | 31.0                                  | -30.2                        |
| Bulgaria                  | 3.8                             | 3.2   | 613                    | 544    | 6.7                      | 5.7  | -11.2                  | 10.7                                  | -21.9                        |

|                        | Population<br>(annual, million) |      | Number of new<br>cases |      | Age-standardized<br>rate |      | Total<br>change<br>(%) | Change<br>due to<br>population<br>(%) | Change<br>due to<br>risk (%) |
|------------------------|---------------------------------|------|------------------------|------|--------------------------|------|------------------------|---------------------------------------|------------------------------|
|                        | 2010                            | 2035 | 2010                   | 2035 | 2010                     | 2035 |                        |                                       |                              |
| Poland†                | 19.8                            | 18.5 | 2195                   | 3551 | 5.4                      | 8.0  | 61.8                   | 43.3                                  | 18.5                         |
| Slovakia               | 1.7                             | 2.7  | 230                    | 577  | 7.3                      | 6.5  | 151.2                  | 181.7                                 | -30.5                        |
| <b>Northern Europe</b> |                                 |      |                        |      |                          |      |                        |                                       |                              |
| Denmark                | 2.8                             | 3.1  | 188                    | 282  | 3.2                      | 3.4  | 49.8                   | 60.3                                  | -10.5                        |
| Estonia                | 0.7                             | 0.6  | 162                    | 134  | 9.9                      | 6.3  | -17.2                  | 28.5                                  | -45.7                        |
| Iceland                | 0.2                             | 0.2  | 12                     | 26   | 4.5                      | 5.5  | 109.7                  | 95.0                                  | 14.7                         |
| Ireland                | 2.3                             | 2.7  | 190                    | 363  | 5.1                      | 5.0  | 91.5                   | 110.6                                 | -19.1                        |
| Lithuania              | 1.7                             | 1.4  | 377                    | 370  | 10.1                     | 9.7  | -1.9                   | 19.5                                  | -21.4                        |
| Norway                 | 2.4                             | 3.0  | 184                    | 240  | 3.5                      | 2.6  | 30.5                   | 79.5                                  | -49.1                        |
| United Kingdom†        | 32.2                            | 36.1 | 3068                   | 3293 | 3.5                      | 3.6  | 7.4                    | 47.4                                  | -40.0                        |
| <b>Southern Europe</b> |                                 |      |                        |      |                          |      |                        |                                       |                              |
| Croatia                | 2.2                             | 2.0  | 379                    | 374  | 6.9                      | 5.2  | -1.3                   | 31.8                                  | -33.1                        |
| Cyprus                 | 0.4                             | 0.7  | 38                     | 129  | 5.0                      | 5.9  | 243.1                  | 143.5                                 | 99.5                         |
| Italy†                 | 30.7                            | 29.3 | 6952                   | 7734 | 7.1                      | 5.5  | 11.3                   | 34.2                                  | -22.9                        |
| Malta                  | 0.2                             | 0.2  | 20                     | 35   | 4.3                      | 5.0  | 78.8                   | 76.7                                  | 2.1                          |
| Slovenia               | 1.0                             | 1.0  | 175                    | 179  | 6.9                      | 5.1  | 2.1                    | 36.9                                  | -34.8                        |
| Spain†                 | 23.7                            | 23.5 | 3284                   | 4519 | 5.3                      | 5.7  | 37.6                   | 46.7                                  | -9.1                         |
| <b>Western Europe</b>  |                                 |      |                        |      |                          |      |                        |                                       |                              |
| Austria                | 4.2                             | 4.5  | 518                    | 653  | 5.2                      | 4.4  | 26.1                   | 65.2                                  | -39.2                        |
| France†                | 32.1                            | 35.0 | 3076                   | 4792 | 3.5                      | 4.1  | 55.8                   | 46.8                                  | 9.0                          |
| Germany†               | 41.2                            | 41.2 | 6617                   | 7854 | 5.7                      | 5.6  | 18.7                   | 26.8                                  | -8.1                         |
| Netherlands            | 8.3                             | 8.9  | 733                    | 1140 | 4.2                      | 4.6  | 55.5                   | 71.6                                  | -16.1                        |
| Switzerland†           | 4.0                             | 4.7  | 354                    | 600  | 3.8                      | 4.3  | 69.5                   | 51.7                                  | 17.7                         |

|                | Population<br>(annual, million) |      | Number of new<br>cases |      | Age-standardized<br>rate |      | Total<br>change<br>(%) | Change<br>due to<br>population<br>(%) | Change<br>due to<br>risk (%) |
|----------------|---------------------------------|------|------------------------|------|--------------------------|------|------------------------|---------------------------------------|------------------------------|
|                | 2010                            | 2035 | 2010                   | 2035 | 2010                     | 2035 |                        |                                       |                              |
| <b>Oceania</b> |                                 |      |                        |      |                          |      |                        |                                       |                              |
| Australia      | 10.9                            | 14.8 | 710                    | 1212 | 3.4                      | 3.4  | 70.6                   | 102.3                                 | -31.7                        |
| New Zealand    | 2.2                             | 2.7  | 141                    | 244  | 3.7                      | 4.4  | 72.7                   | 94.7                                  | -22.1                        |

†regional registries: Brazil (Goiana), Chile (Valdivia), China (HongKong, Jiashan, Shanghai), Colombia (Cali), France (Bas-Rhin, Calvados, Doubs, Haut-Rhin, Herault, Isere, Loire-Atlantique, Manche, Martinique, Somme), Germany (Hamburg, Saarland), Italy (Biella, Ferrara, Modena, Naples, Parma, Ragusa, Romagna, Veneto), Japan (Miyagi, Nagasaki, Osaka), Poland (Kielce), Republic of Korea (Busan, Gwangju, Incheon, Seoul, Ulsan), Spain (Albacete, Basque Country, Canary Islands, Cuenca, Girona, Granada, Murcia, Navarra, Tarragona), Switzerland (Geneva, Neuchatel, St Gall-Appenzell, Ticino, Valais, Vaud), Thailand (Chiang Mai, Khon Kaen, Lampang, Songkhla), Turkey (Antalya, Izmir), UK (East England, East Midlands, London, North East, North West, South East, South West, West Midlands, Yorkshire-Humber, Northern Ireland, Scotland), U.S. (SEER9 that includes the states of Connecticut, Hawaii, Iowa, New Mexico and Utah, and the areas of Detroit in Michigan, San Francisco in California, Atlanta in Georgia, and Seattle in Washington)

**Annex Table 3:** Number of new gastric cancer cases, age-standardized incidence rates and percentage change in cases due to population and risk, 2010 and 2035, both sexes combined, age <50 years.

|                           | Population<br>(annual, million) |       | Number of new<br>cases |       | Age-standardized<br>rate |      | Total<br>change<br>(%) | Change<br>due to<br>population<br>(%) | Change<br>due to<br>risk (%) |
|---------------------------|---------------------------------|-------|------------------------|-------|--------------------------|------|------------------------|---------------------------------------|------------------------------|
|                           | 2010                            | 2035  | 2010                   | 2035  | 2010                     | 2035 |                        |                                       |                              |
| <b>South America</b>      |                                 |       |                        |       |                          |      |                        |                                       |                              |
| Brazil†                   | 158.2                           | 149.0 | 3061                   | 1818  | 1.8                      | 0.9  | -40.6                  | 20.6                                  | -61.2                        |
| Chile†                    | 12.9                            | 12.6  | 443                    | 734   | 2.8                      | 3.9  | 65.9                   | 17.4                                  | 48.4                         |
| Colombia†                 | 37.5                            | 36.1  | 1365                   | 609   | 3.3                      | 1.2  | -55.4                  | 21.9                                  | -77.2                        |
| <b>Northern America</b>   |                                 |       |                        |       |                          |      |                        |                                       |                              |
| Canada                    | 17.2                            | 24.1  | 217                    | 471   | 0.9                      | 1.3  | 117.5                  | 38.7                                  | 78.9                         |
| U.S.†                     | 210.1                           | 227.5 | 2322                   | 4032  | 0.8                      | 1.3  | 73.6                   | 11.1                                  | 62.5                         |
| U.S.: Black†              | 31.7                            | 33.7  | 432                    | 484   | 1.1                      | 1.0  | 12.1                   | 21.9                                  | -9.8                         |
| U.S.: White†              | 161.7                           | 161.6 | 1619                   | 1871  | 0.7                      | 0.8  | 15.5                   | 2.7                                   | 12.8                         |
| <b>Eastern Asia</b>       |                                 |       |                        |       |                          |      |                        |                                       |                              |
| China†                    | 1023.4                          | 833.9 | 29904                  | 29305 | 2.1                      | 2.0  | -2.0                   | -4.3                                  | 2.3                          |
| Japan†                    | 72.9                            | 55.5  | 4428                   | 2788  | 4.0                      | 3.4  | -37.0                  | -24.0                                 | -13.1                        |
| Republic of Korea†        | 35.2                            | 26.6  | 4674                   | 2426  | 8.4                      | 5.6  | -48.1                  | -22.3                                 | -25.8                        |
| <b>South-Eastern Asia</b> |                                 |       |                        |       |                          |      |                        |                                       |                              |
| Thailand†                 | 50.0                            | 38.8  | 694                    | 643   | 1.0                      | 1.1  | -7.2                   | -19.7                                 | 12.4                         |
| <b>Western Asia</b>       |                                 |       |                        |       |                          |      |                        |                                       |                              |
| Turkey†                   | 58.3                            | 61.7  | 1145                   | 979   | 1.9                      | 1.2  | -14.5                  | 30.8                                  | -45.3                        |
| <b>Eastern Europe</b>     |                                 |       |                        |       |                          |      |                        |                                       |                              |
| Belarus                   | 6.3                             | 5.3   | 312                    | 309   | 3.4                      | 3.7  | -1.0                   | -12.5                                 | 11.6                         |
| Bulgaria                  | 4.6                             | 3.2   | 109                    | 63    | 1.6                      | 1.2  | -42.5                  | -24.2                                 | -18.2                        |



|                        | Population<br>(annual, million) |      | Number of new<br>cases |      | Age-standardized<br>rate |      | Total<br>change<br>(%) | Change<br>due to<br>population<br>(%) | Change<br>due to<br>risk (%) |
|------------------------|---------------------------------|------|------------------------|------|--------------------------|------|------------------------|---------------------------------------|------------------------------|
|                        | 2010                            | 2035 | 2010                   | 2035 | 2010                     | 2035 |                        |                                       |                              |
| Poland†                | 25.1                            | 18.7 | 637                    | 791  | 1.9                      | 2.4  | 24.2                   | -3.9                                  | 28.0                         |
| Slovakia               | 2.2                             | 2.9  | 51                     | 85   | 1.7                      | 1.8  | 66.3                   | 52.9                                  | 13.4                         |
| <b>Northern Europe</b> |                                 |      |                        |      |                          |      |                        |                                       |                              |
| Denmark                | 3.5                             | 3.6  | 38                     | 24   | 0.7                      | 0.5  | -35.6                  | -3.5                                  | -32.1                        |
| Estonia                | 0.8                             | 0.7  | 30                     | 17   | 2.5                      | 1.6  | -42.6                  | -11.8                                 | -30.8                        |
| Iceland                | 0.2                             | 0.2  | 2                      | 2    | 0.6                      | 0.8  | 33.3                   | 8.9                                   | 24.4                         |
| Ireland                | 3.3                             | 3.2  | 41                     | 28   | 1.0                      | 0.7  | -33.3                  | -6.8                                  | -26.5                        |
| Lithuania              | 2.1                             | 1.5  | 89                     | 75   | 2.9                      | 3.3  | -15.9                  | -25.9                                 | 10.0                         |
| Norway                 | 3.3                             | 3.8  | 30                     | 35   | 0.7                      | 0.7  | 15.3                   | 16.2                                  | -0.9                         |
| United Kingdom†        | 41.3                            | 42.2 | 398                    | 832  | 0.7                      | 1.4  | 109.0                  | -0.2                                  | 109.2                        |
| <b>Southern Europe</b> |                                 |      |                        |      |                          |      |                        |                                       |                              |
| Croatia                | 2.7                             | 2.0  | 61                     | 45   | 1.5                      | 1.4  | -26.9                  | -21.1                                 | -5.8                         |
| Cyprus                 | 0.6                             | 0.8  | 7                      | 8    | 0.9                      | 0.7  | 21.2                   | 57.6                                  | -36.4                        |
| Italy†                 | 35.7                            | 27.7 | 733                    | 389  | 1.2                      | 1.0  | -46.8                  | -32.2                                 | -14.6                        |
| Malta                  | 0.3                             | 0.2  | 3                      | 2    | 0.9                      | 0.6  | -25.0                  | 8.3                                   | -33.3                        |
| Slovenia               | 1.3                             | 1.0  | 39                     | 17   | 1.9                      | 1.1  | -55.4                  | -23.4                                 | -32.1                        |
| Spain†                 | 30.4                            | 21.9 | 574                    | 557  | 1.2                      | 1.7  | -3.0                   | -34.2                                 | 31.1                         |
| <b>Western Europe</b>  |                                 |      |                        |      |                          |      |                        |                                       |                              |
| Austria                | 5.3                             | 4.8  | 95                     | 76   | 1.1                      | 1.0  | -19.8                  | -12.9                                 | -6.9                         |
| France†                | 40.3                            | 39.5 | 489                    | 528  | 0.9                      | 1.0  | 7.9                    | -7.9                                  | 15.8                         |
| Germany†               | 48.3                            | 42.6 | 933                    | 694  | 1.1                      | 1.0  | -25.6                  | -17.4                                 | -8.2                         |
| Netherlands            | 10.7                            | 9.9  | 146                    | 195  | 0.9                      | 1.4  | 33.5                   | -12.0                                 | 45.5                         |
| Switzerland†           | 5.0                             | 5.2  | 87                     | 81   | 1.1                      | 1.0  | -7.1                   | -2.6                                  | -4.5                         |

|                | Population<br>(annual, million) |      | Number of new<br>cases |      | Age-standardized<br>rate |      | Total<br>change<br>(%) | Change<br>due to<br>population<br>change<br>(%) | Change<br>due to<br>risk (%) |
|----------------|---------------------------------|------|------------------------|------|--------------------------|------|------------------------|-------------------------------------------------|------------------------------|
|                | 2010                            | 2035 | 2010                   | 2035 | 2010                     | 2035 |                        |                                                 |                              |
| <b>Oceania</b> |                                 |      |                        |      |                          |      |                        |                                                 |                              |
| Australia      | 15.0                            | 18.4 | 162                    | 248  | 0.8                      | 1.0  | 53.2                   | 24.3                                            | 28.9                         |
| New Zealand    | 3.0                             | 3.3  | 48                     | 73   | 1.2                      | 1.6  | 52.5                   | 11.1                                            | 41.5                         |

†regional registries: Brazil (Goiana), Chile (Valdivia), China (HongKong, Jiashan, Shanghai), Colombia (Cali), France (Bas-Rhin, Calvados, Doubs, Haut-Rhin, Herault, Isere, Loire-Atlantique, Manche, Martinique, Somme), Germany (Hamburg, Saarland), Italy (Biella, Ferrara, Modena, Naples, Parma, Ragusa, Romagna, Veneto), Japan (Miyagi, Nagasaki, Osaka), Poland (Kielce), Republic of Korea (Busan, Gwangju, Incheon, Seoul, Ulsan), Spain (Albacete, Basque Country, Canary Islands, Cuenca, Girona, Granada, Murcia, Navarra, Tarragona), Switzerland (Geneva, Neuchatel, St Gall-Appenzell, Ticino, Valais, Vaud), Thailand (Chiang Mai, Khon Kaen, Lampang, Songkhla), Turkey (Antalya, Izmir), UK (East England, East Midlands, London, North East, North West, South East, South West, West Midlands, Yorkshire-Humber, Northern Ireland, Scotland), U.S. (SEER9 that includes the states of Connecticut, Hawaii, Iowa, New Mexico and Utah, and the areas of Detroit in Michigan, San Francisco in California, Atlanta in Georgia, and Seattle in Washington)

**Annex Figure 1.** Age-standardized gastric cancer incidence rates (ASR) in 2010 and predicted rates in 2035 by sex.

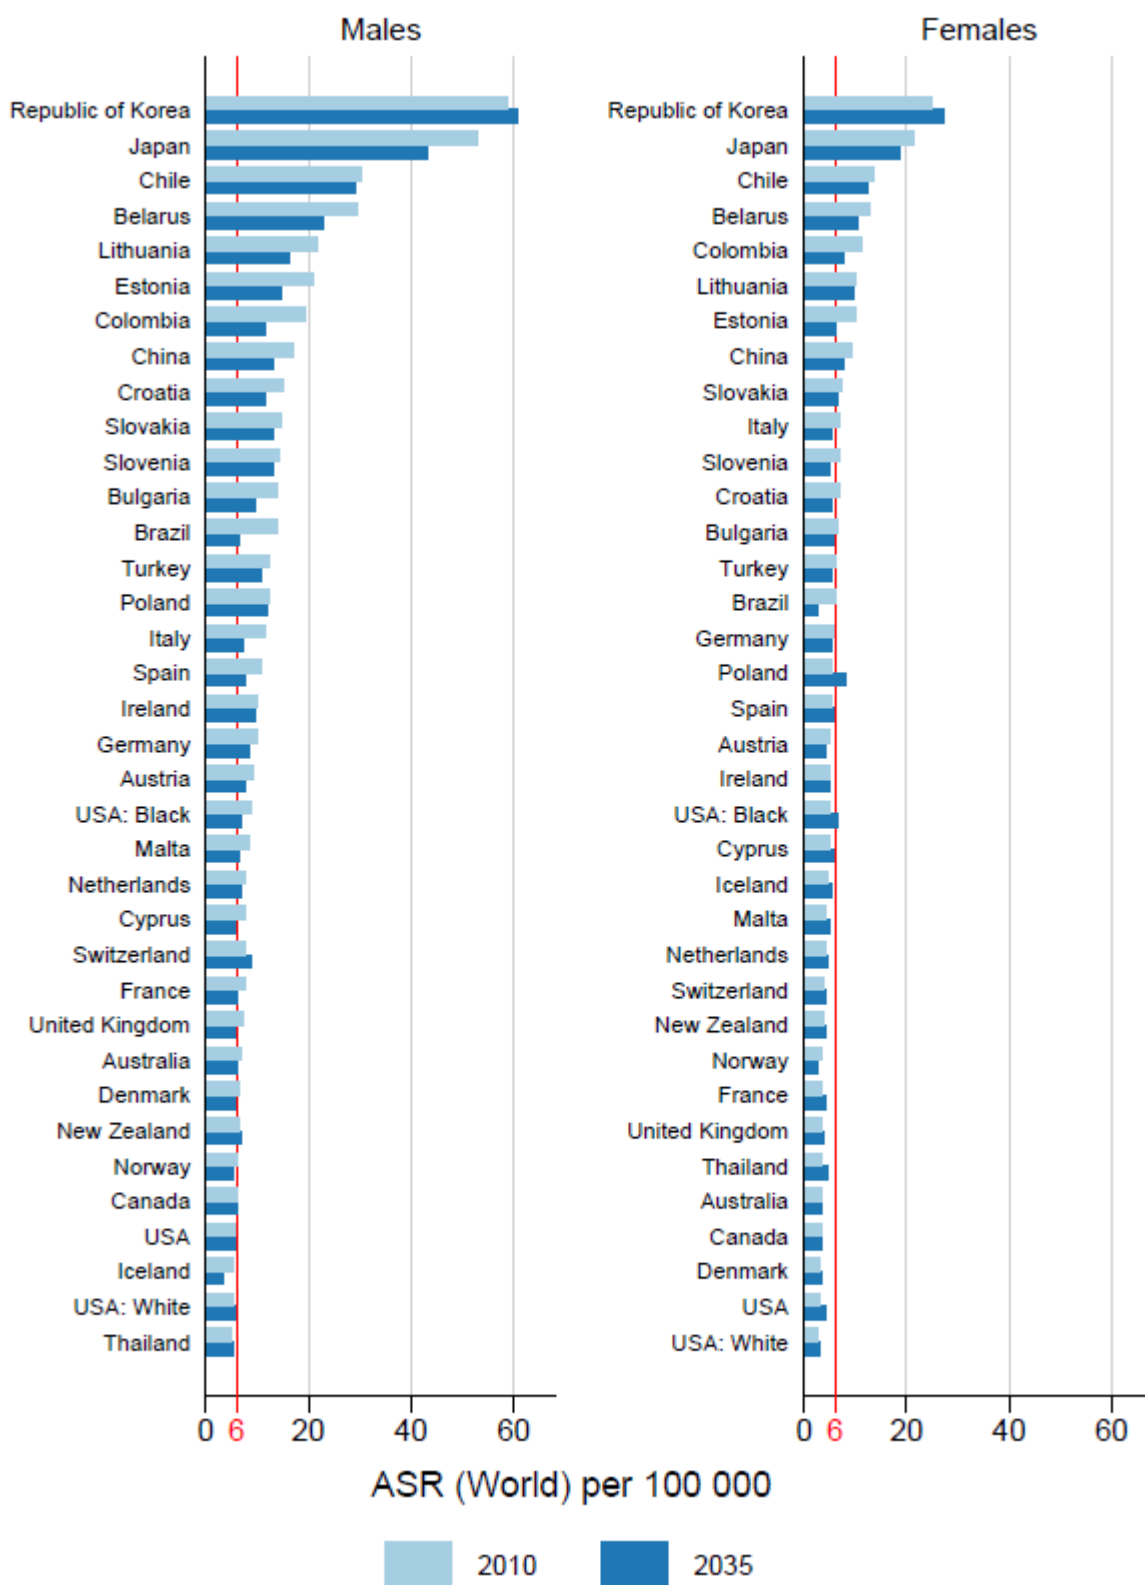

**Annex Figure 2.** Trends in (truncated) age-standardized gastric cancer incidence rates by country and age in both sexes: observed (solid lines) and predicted (dashed lines)

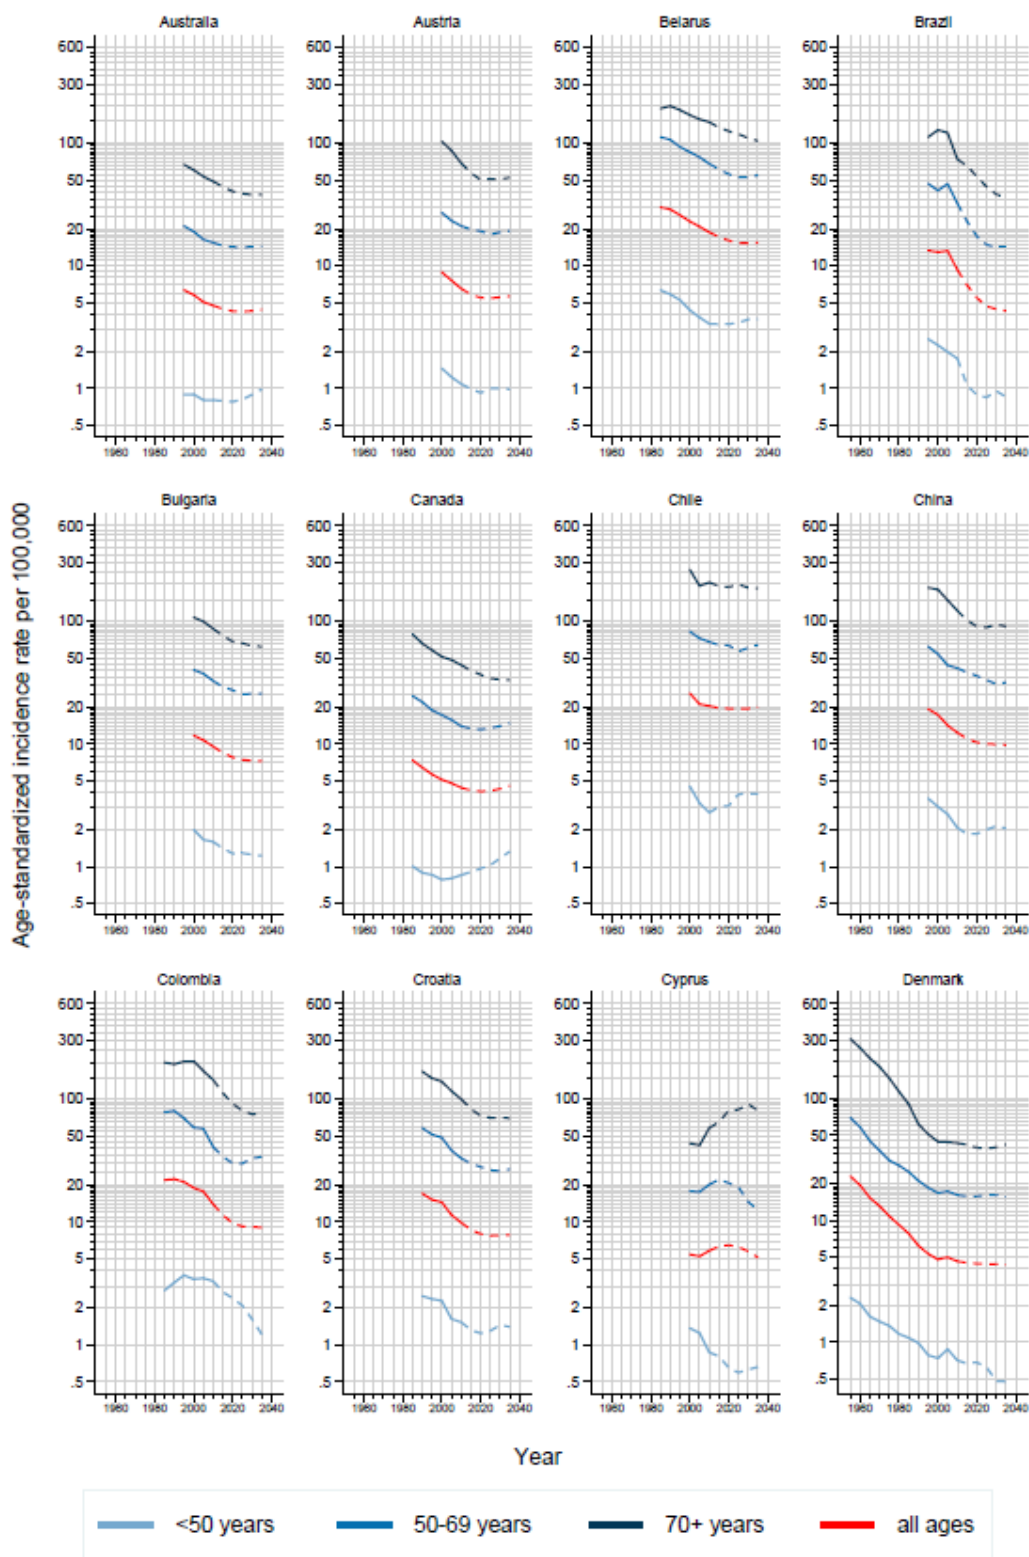

**Annex Figure 2 (cont.).** Trends in (truncated) age-standardized gastric cancer incidence rates by country and age in both sexes: observed (solid lines) and predicted (dashed lines)

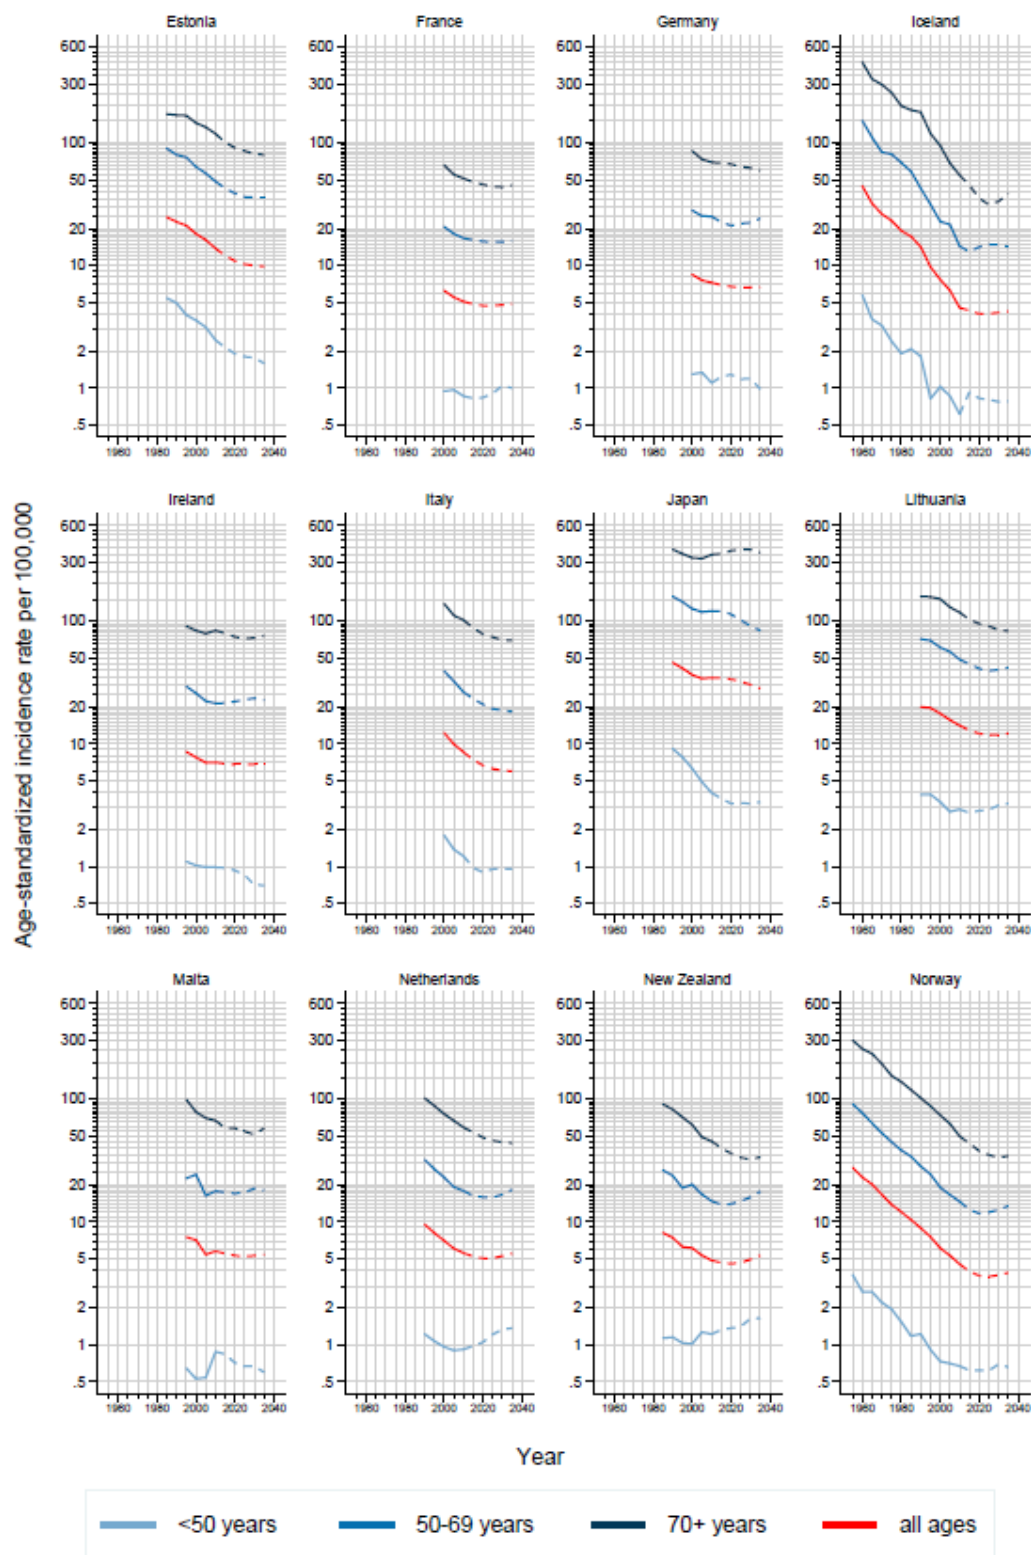

**Annex Figure 2 (cont.).** Trends in (truncated) age-standardized gastric cancer incidence rates by country and age in both sexes: observed (solid lines) and predicted (dashed lines)

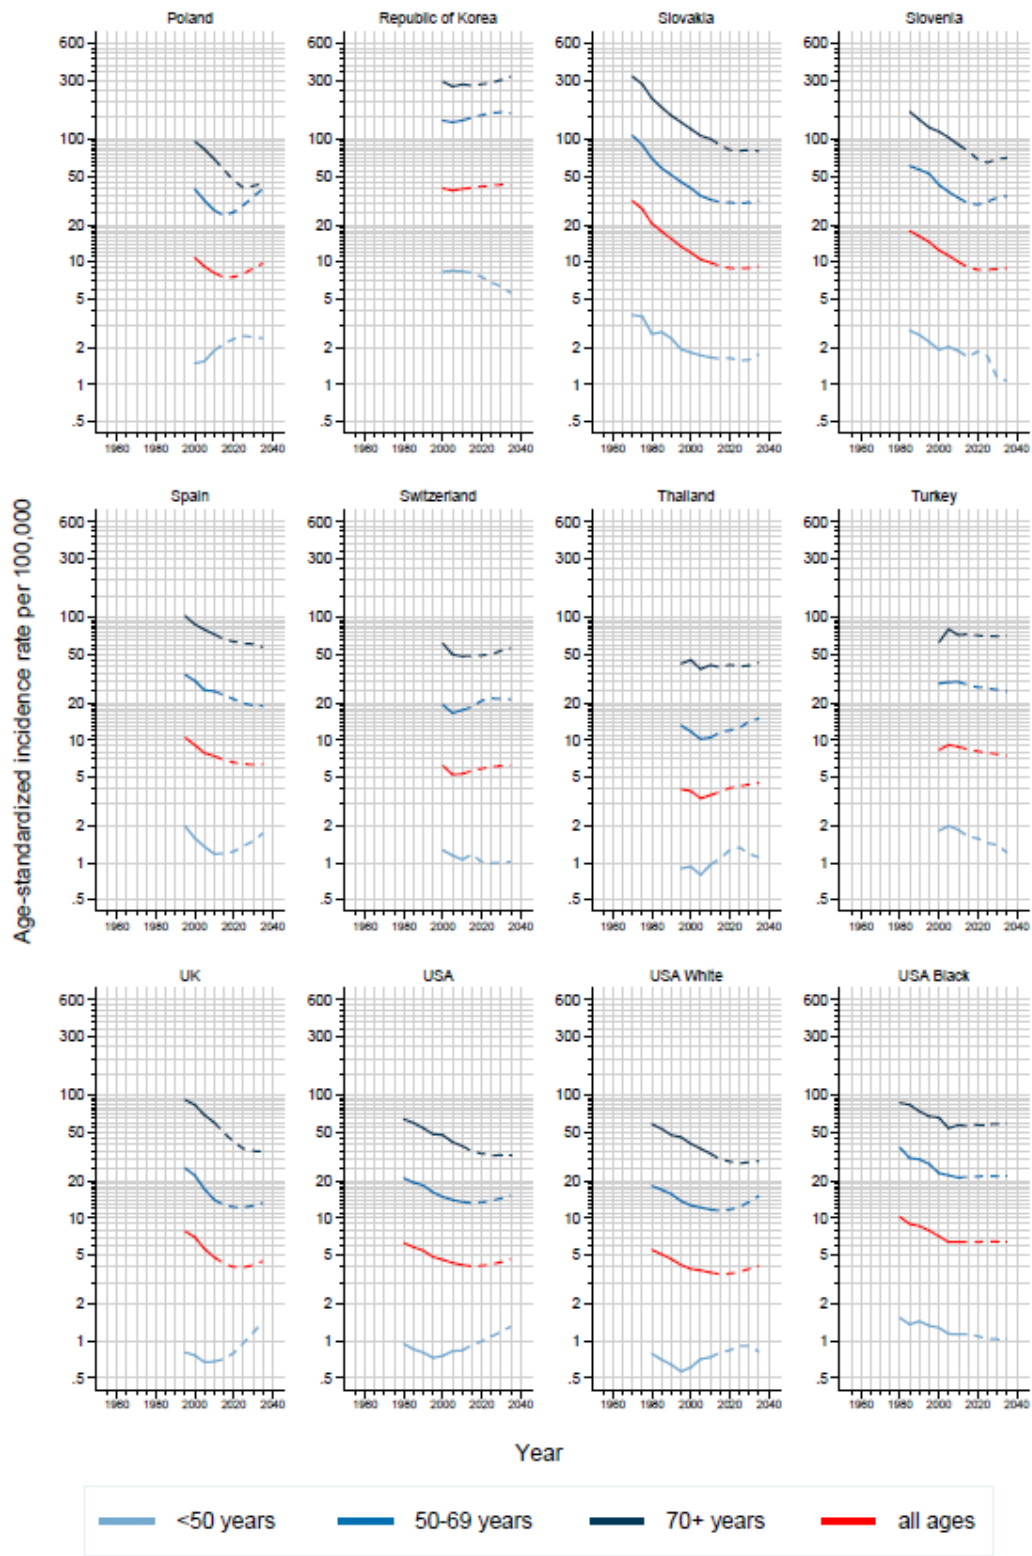

**Annex Figure 3.** Trends in (truncated) age-standardized gastric cancer incidence rates by country and age in males: observed (solid lines) and predicted (dashed lines)

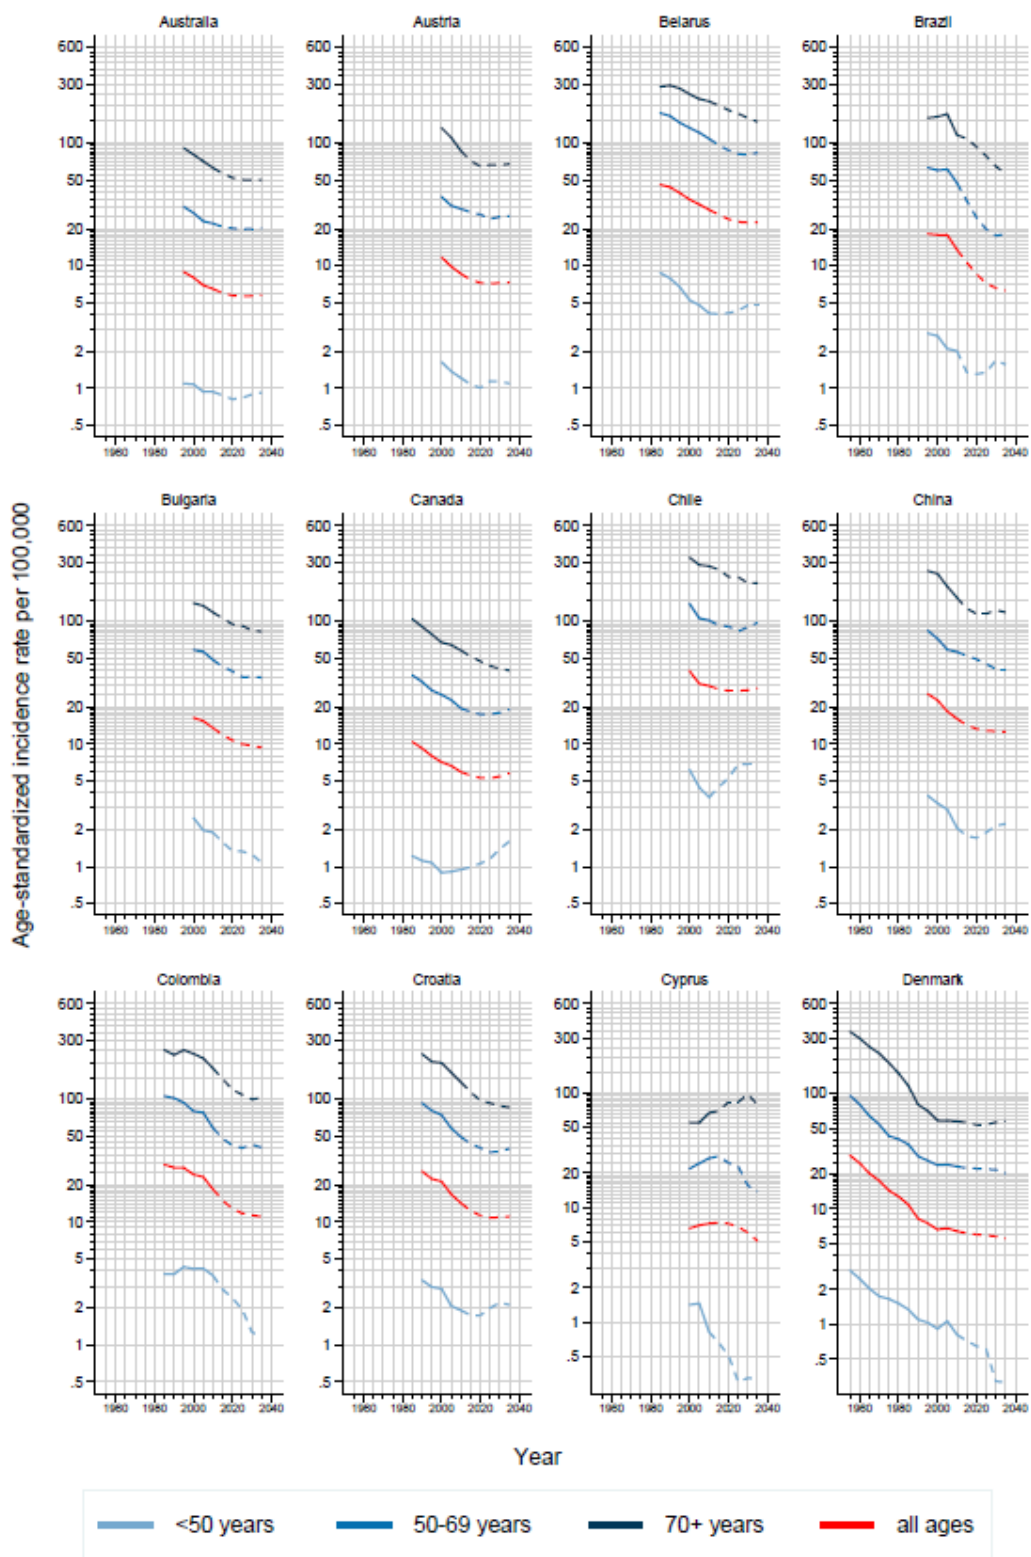

**Annex Figure 3 (cont.).** Trends in (truncated) age-standardized gastric cancer incidence rates by country and age in males: observed (solid lines) and predicted (dashed lines)

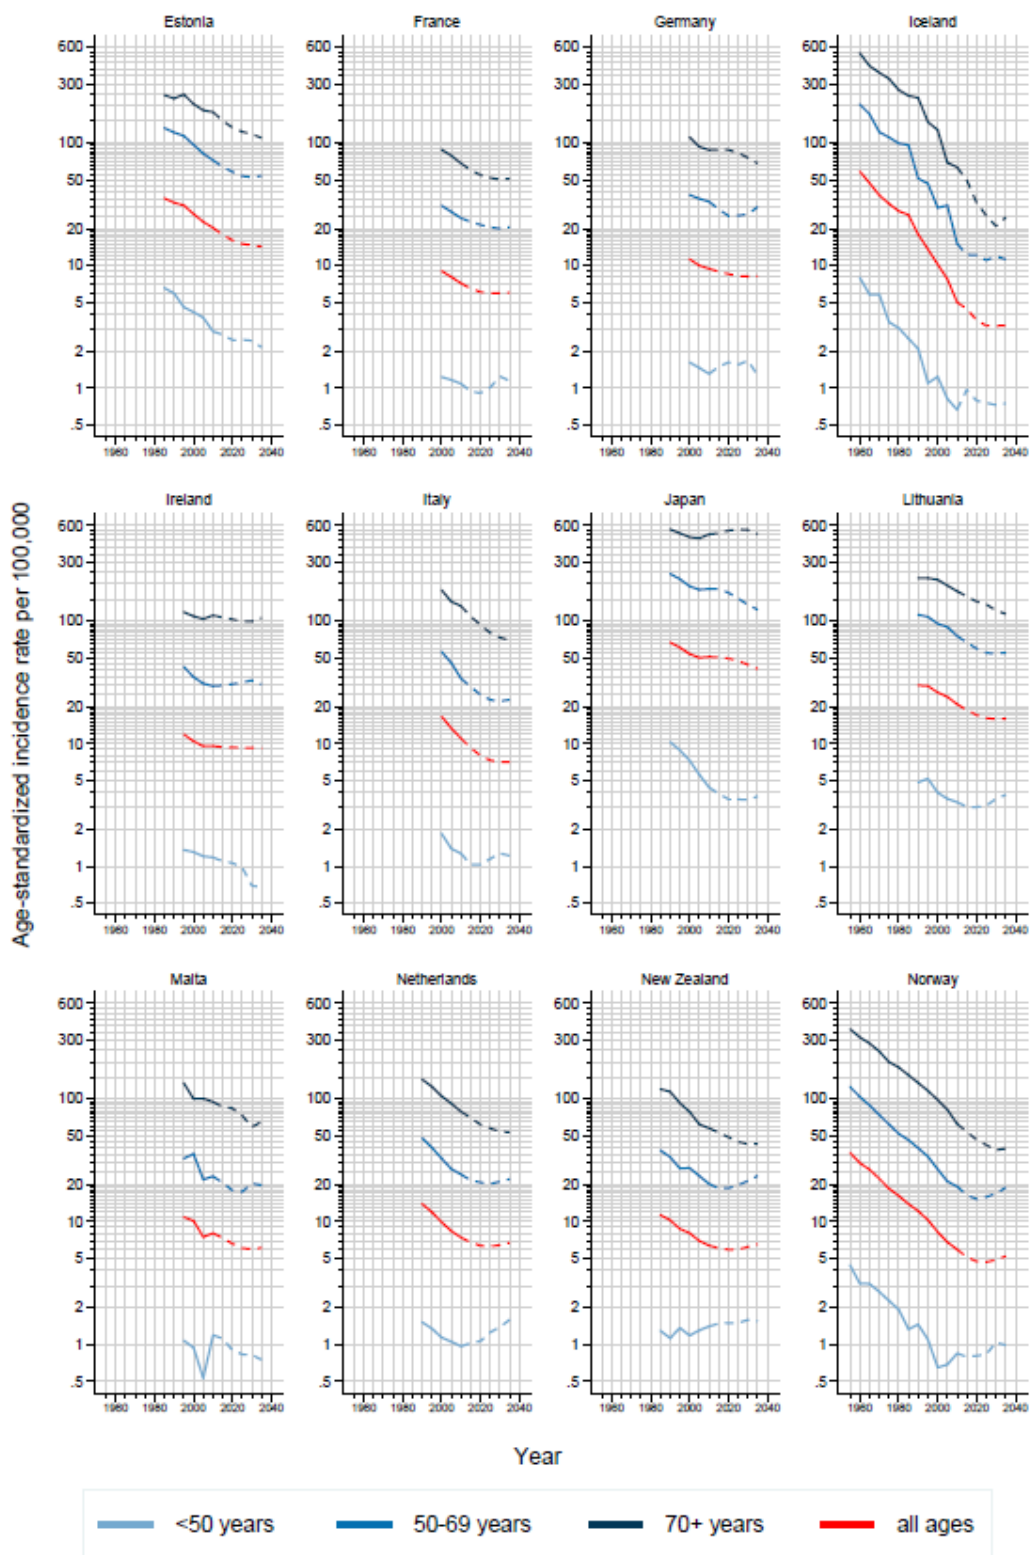



**Annex Figure 3 (cont.).** Trends in (truncated) age-standardized gastric cancer incidence rates by country and age in males: observed (solid lines) and predicted (dashed lines)

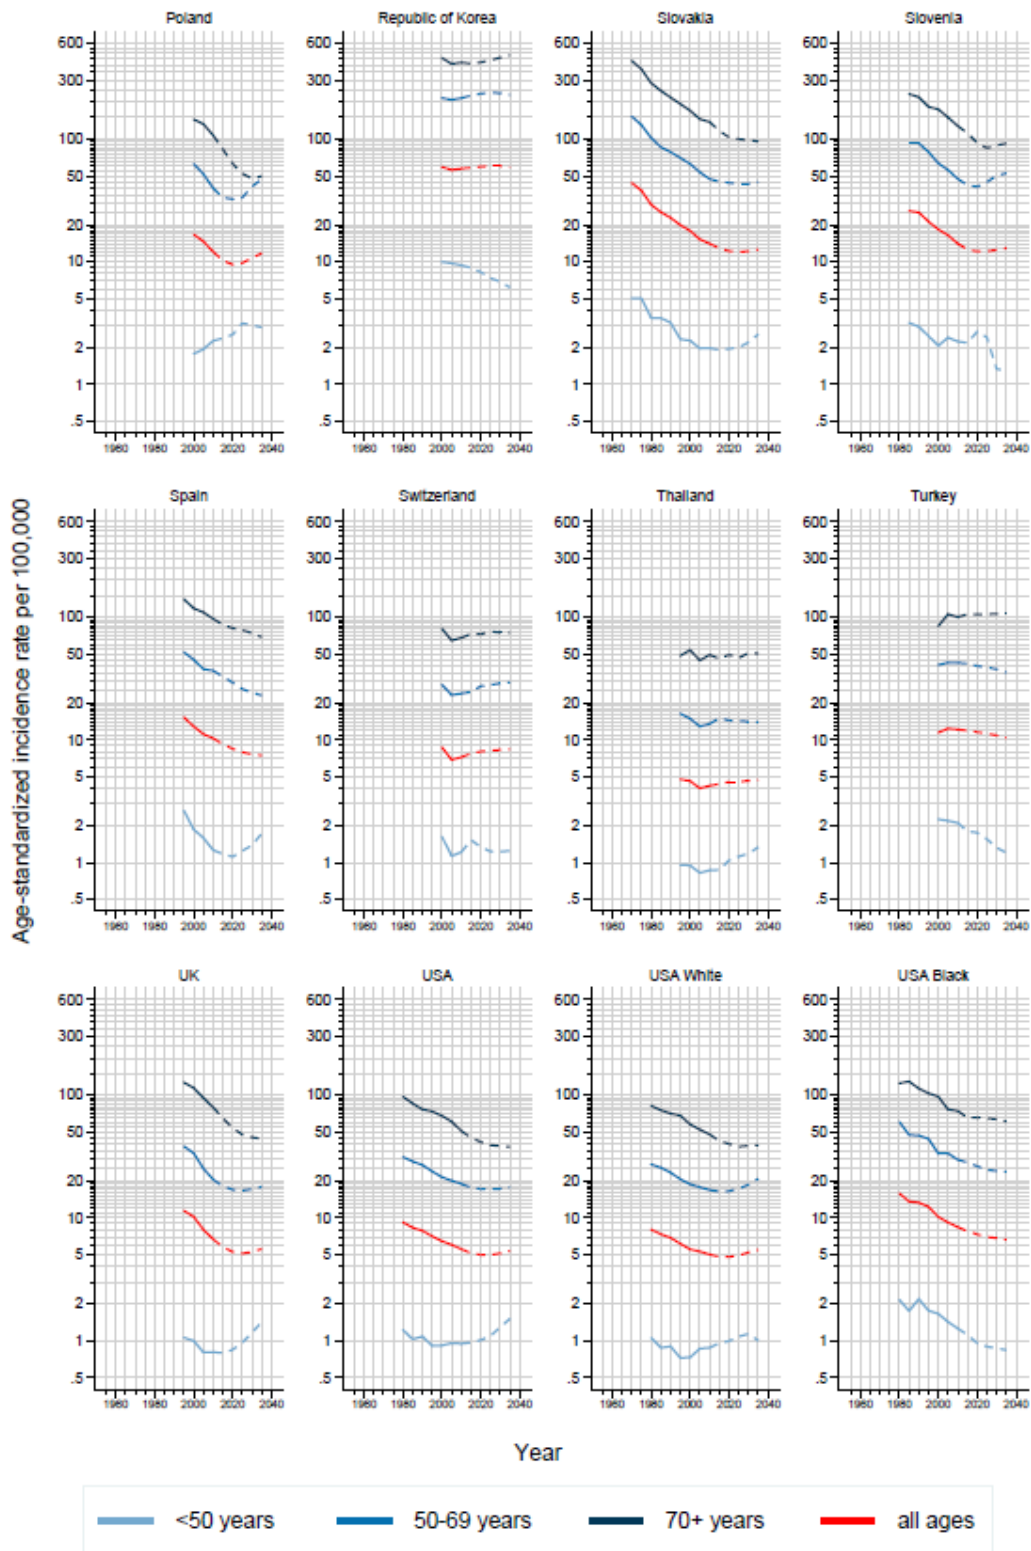

**Annex Figure 4.** Trends in (truncated) age-standardized gastric cancer incidence rates by country and age in females: observed (solid lines) and predicted (dashed lines)

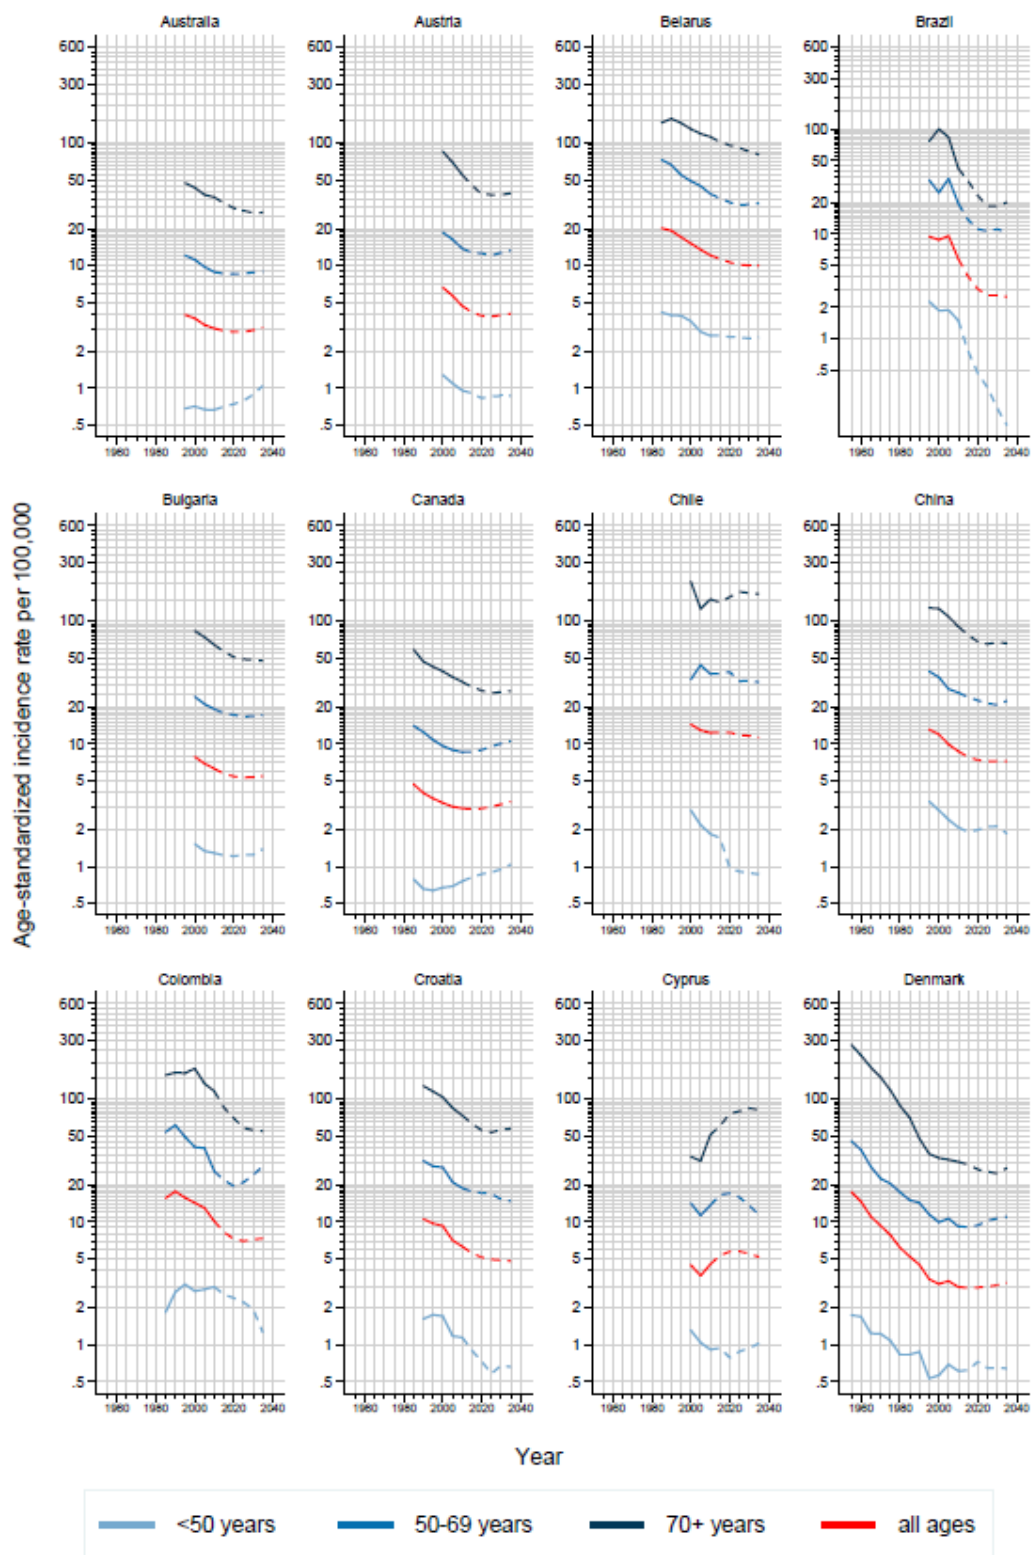

**Annex Figure 4 (cont.).** Trends in (truncated) age-standardized gastric cancer incidence rates by country and age in females: observed (solid lines) and predicted (dashed lines)

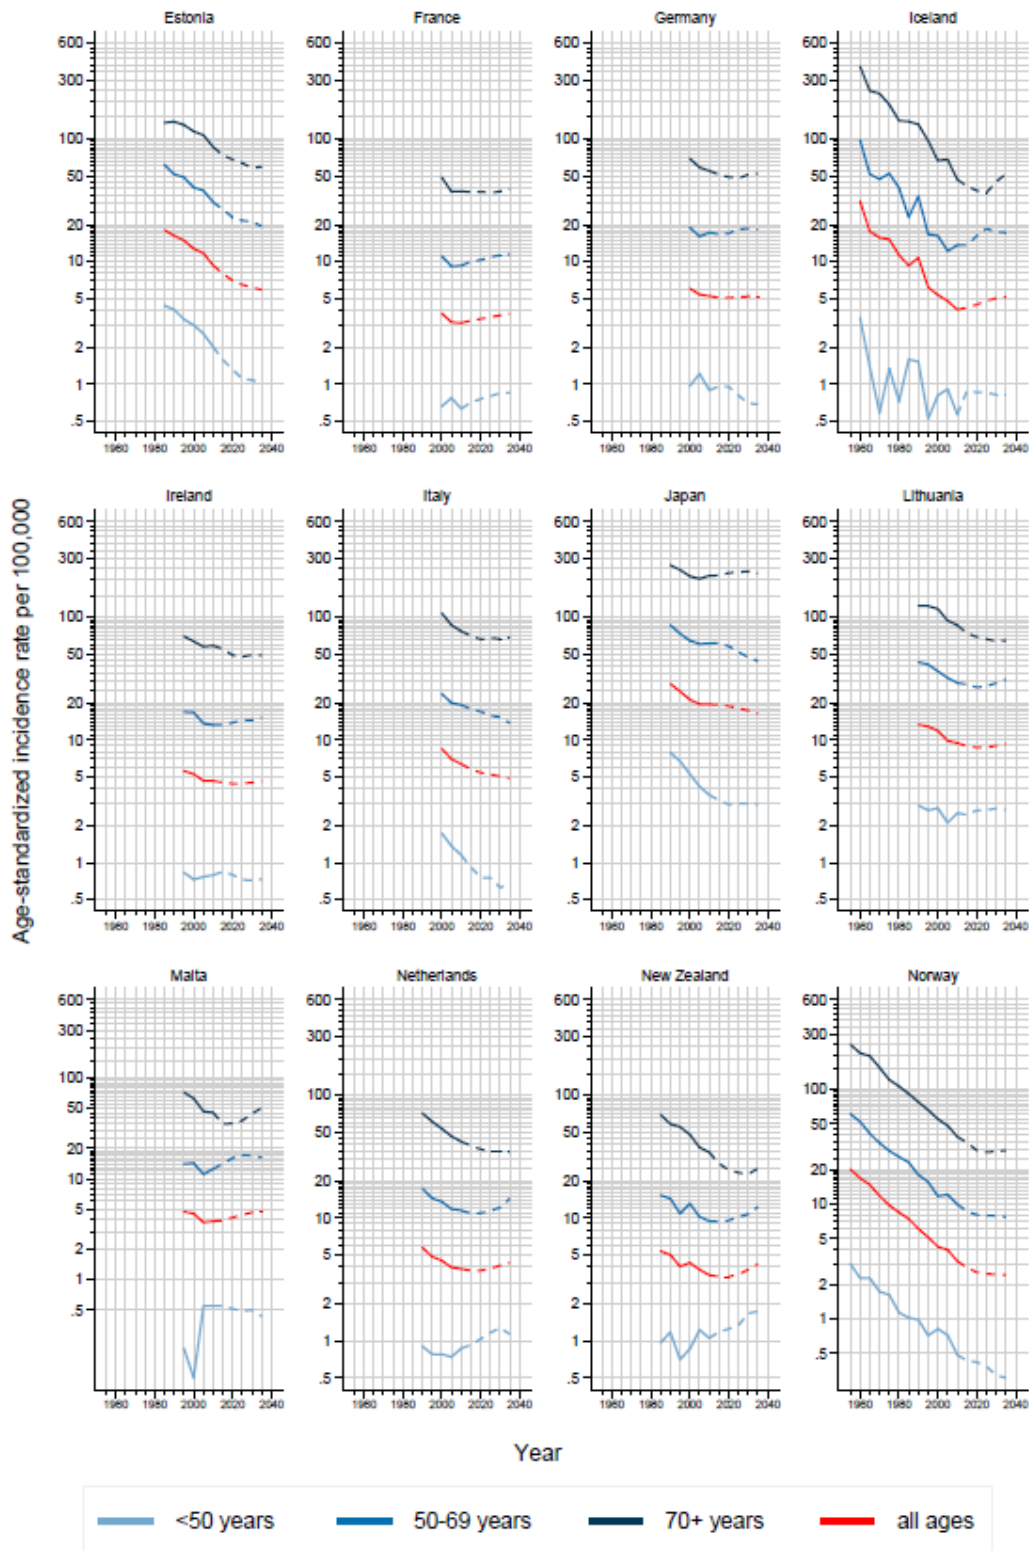

**Annex Figure 4 (cont.).** Trends in (truncated) age-standardized gastric cancer incidence rates by country and age in females: observed (solid lines) and predicted (dashed lines)

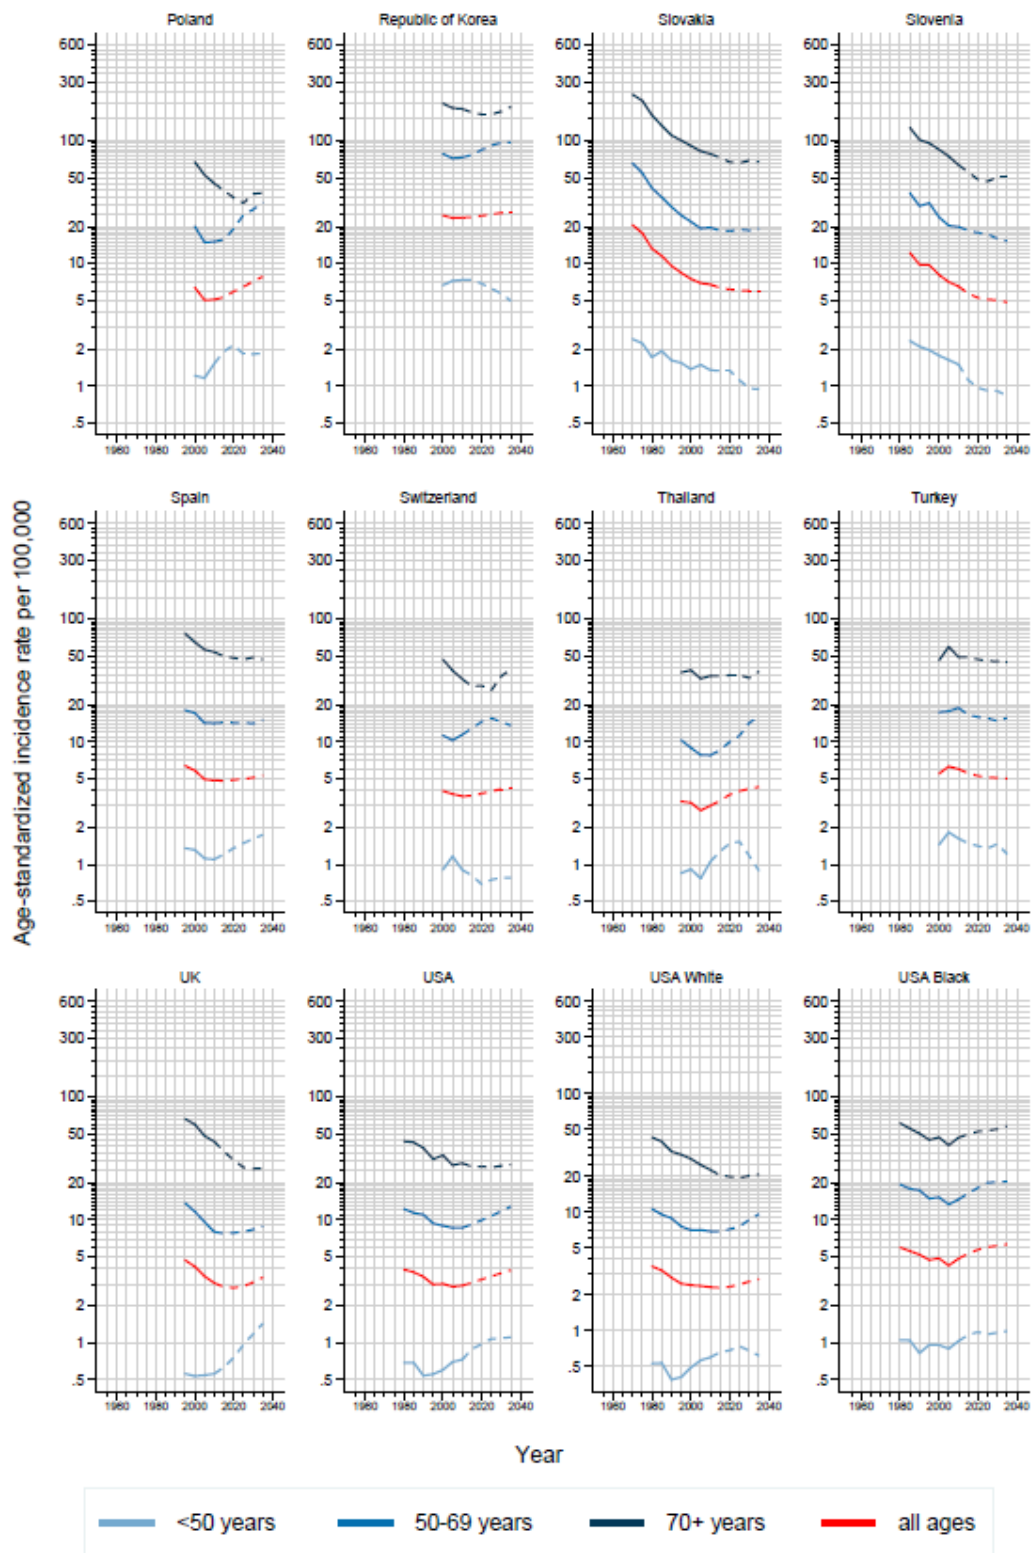

Supplement: NIHMS1742642-supplement-Annex_tables_and_figures.pdf [file NIHMS1742642-supplement-Annex_tables_and_figures.pdf]
